# Supplementary material for: Regulation of ribonucleotide synthesis by the Pseudomonas aeruginosa two-component system AlgR in response to oxidative stress
Source: PubMed Central journal article supplement (PMC5738425; doi:10.1038/s41598-017-17917-7), 2017-12-20
Supplement: 41598_2017_17917_MOESM1_ESM.pdf [file 41598_2017_17917_MOESM1_ESM.pdf]

# **Regulation of ribonucleotide synthesis by the *Pseudomonas aeruginosa* two-component system AlgR in response to oxidative stress**

Anna Crespo<sup>1¶</sup>, Lucas Pedraz<sup>1¶</sup>, Marc Van Der Hofstadt<sup>2</sup>, Gabriel Gomila<sup>2</sup>, Eduard Torrents<sup>1\*</sup>

<sup>1</sup> Bacterial Infections: Antimicrobial Therapies, Institute for Bioengineering of Catalonia (IBEC), The Barcelona Institute of Science and Technology, Barcelona, Spain.

<sup>2</sup> Nanoscale Bioelectrical Characterization, Institute for Bioengineering of Catalonia (IBEC), The Barcelona Institute of Science and Technology, Barcelona, Spain.

\*: Corresponding author; e-mail: [etorrents@ibecbarcelona.eu](mailto:etorrents@ibecbarcelona.eu) (ET)

¶: AC and LP, listed in alphabetical order, contributed equally to this work.

**Supplementary Fig. S1. Count matrices for AlgR-box identification.** Count matrices were generated by FIMO search using three different sets of sequences containing AlgR binding spots (see Materials and Methods). Matrices are adjusted for a box size of 11 bp, represented in rows, and the bases are expressed in columns in the order A–C–G–T; each matrix is accompanied by its corresponding HMM logo.

**Set 1:** 50 best hits in ChIP-seq

|    |    |    |    |
|----|----|----|----|
| 30 | 0  | 19 | 1  |
| 0  | 50 | 0  | 0  |
| 1  | 49 | 0  | 0  |
| 6  | 0  | 42 | 2  |
| 2  | 2  | 0  | 46 |
| 0  | 5  | 0  | 45 |
| 0  | 46 | 3  | 1  |
| 5  | 0  | 44 | 1  |
| 0  | 0  | 0  | 50 |
| 0  | 50 | 0  | 0  |
| 6  | 6  | 32 | 6  |

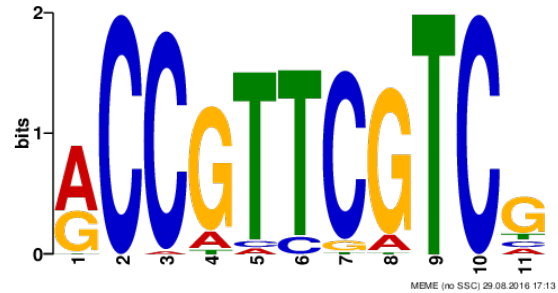

**Set 2:** 25 random hits in ChIP-seq

|    |    |    |    |
|----|----|----|----|
| 4  | 2  | 6  | 11 |
| 14 | 3  | 4  | 2  |
| 0  | 23 | 0  | 0  |
| 0  | 23 | 0  | 0  |
| 1  | 0  | 21 | 1  |
| 0  | 3  | 0  | 20 |
| 0  | 6  | 0  | 17 |
| 0  | 19 | 4  | 0  |
| 5  | 0  | 18 | 0  |
| 1  | 0  | 0  | 22 |
| 0  | 23 | 0  | 0  |

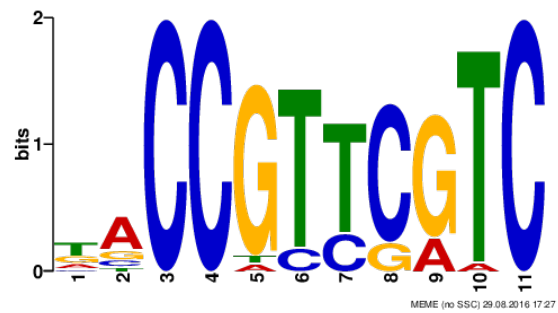

**Set 3:** Published sequences

|   |    |    |    |
|---|----|----|----|
| 3 | 4  | 3  | 1  |
| 0 | 11 | 0  | 0  |
| 0 | 11 | 0  | 0  |
| 0 | 1  | 10 | 0  |
| 0 | 0  | 0  | 11 |
| 0 | 2  | 1  | 8  |
| 0 | 6  | 3  | 2  |
| 1 | 0  | 8  | 2  |
| 0 | 0  | 2  | 9  |
| 0 | 11 | 0  | 0  |
| 1 | 6  | 3  | 1  |

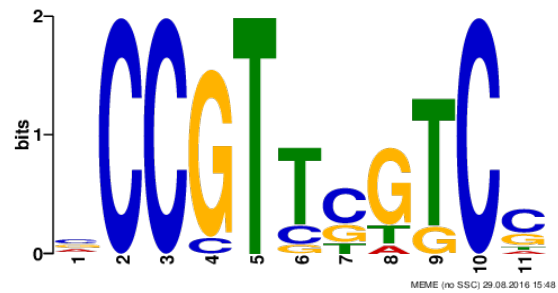

### Original Figure 3

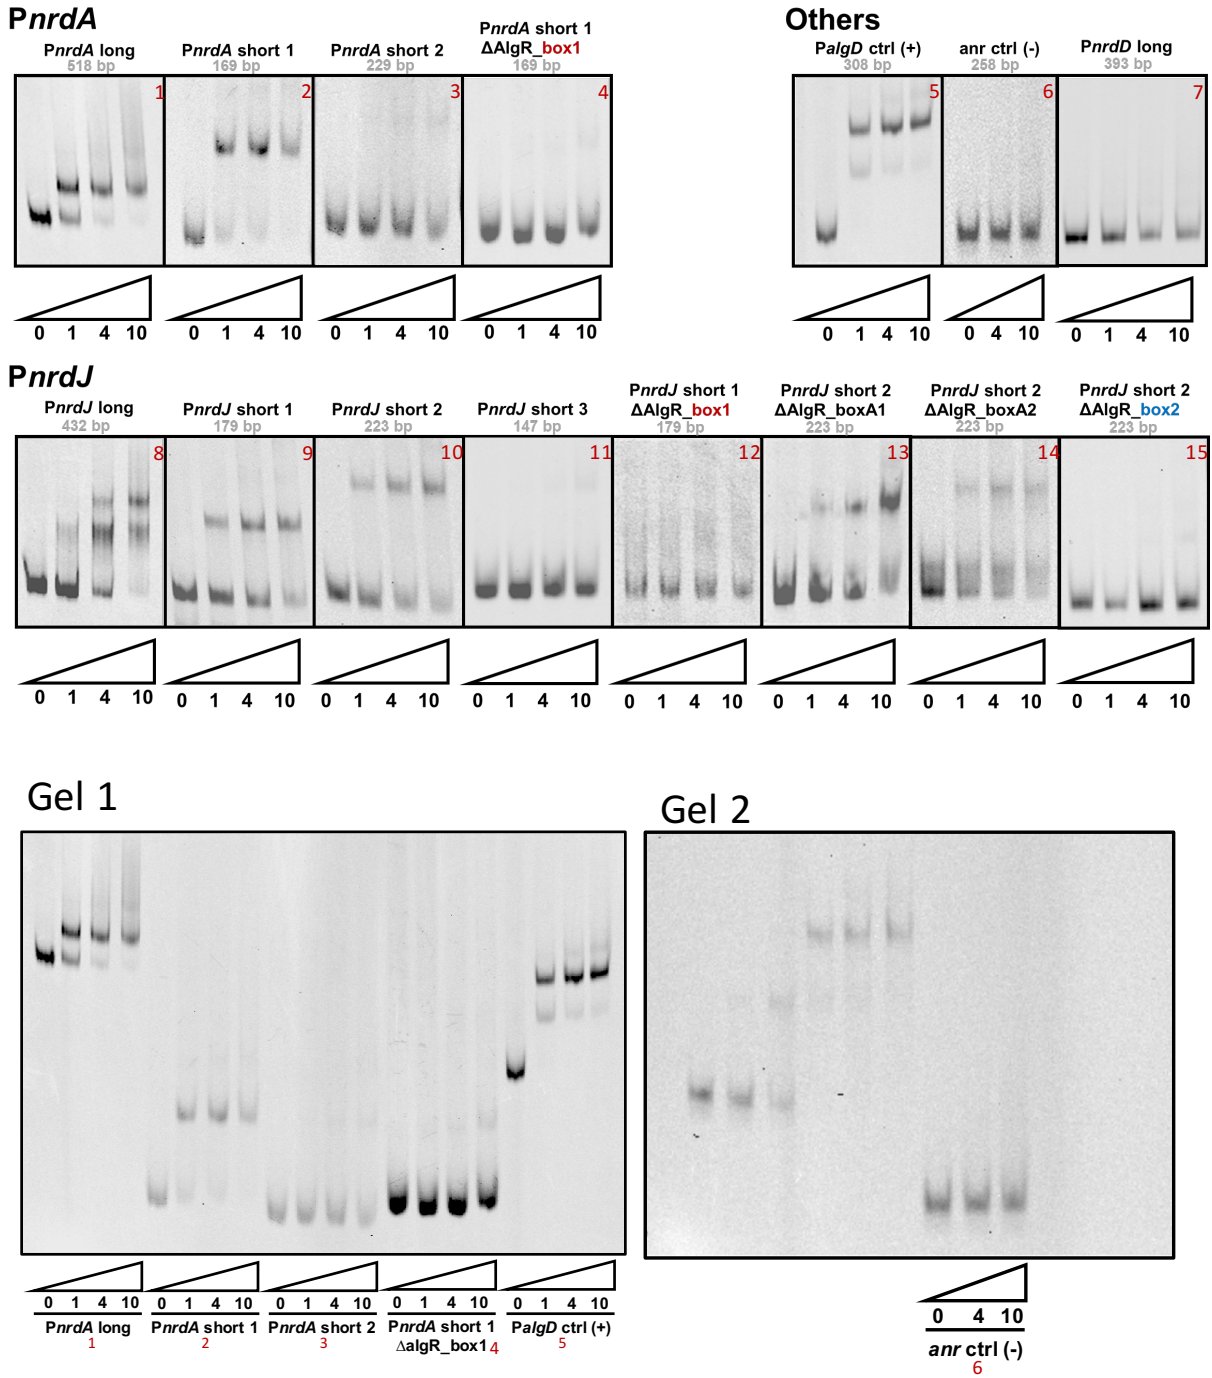

Gel 3

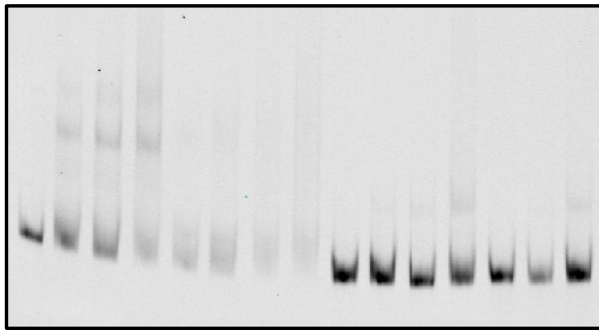

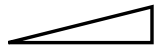  
 0 1 4 10  
*PnrJ* short 2  
 10

Gel 4

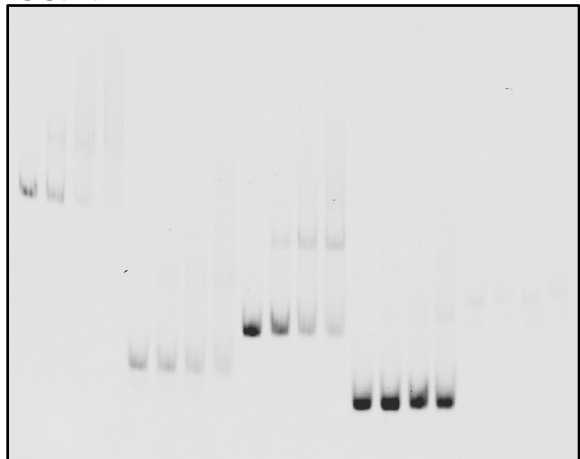

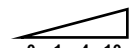  
 0 1 4 10  
*PnrJ* short 3  
 11

Gel 5

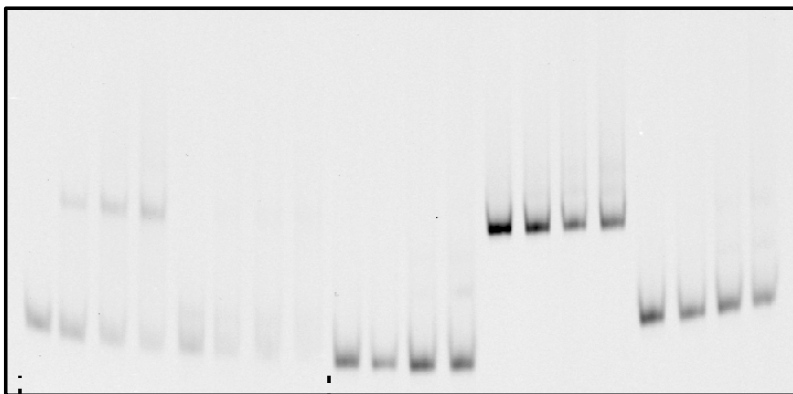




  
 0 1 4 10 0 1 4 10 0 1 4 10 0 1 4 10  
*PnrJ* short 1 *PnrJ* short 1 *PnrJ* short 1 *PnrD* long  
 9  $\Delta$ AlgR\_boxA2  $\Delta$ AlgR\_box2 7  
 15

Longer exposure

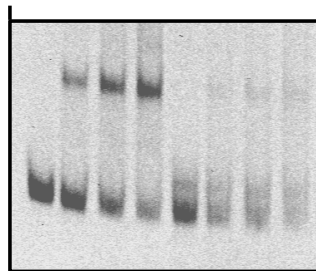


  
 0 1 4 10 0 1 4 10  
*PnrJ* short 1 *PnrJ* short 1  
 14  $\Delta$ AlgR\_boxA2

Gel 6

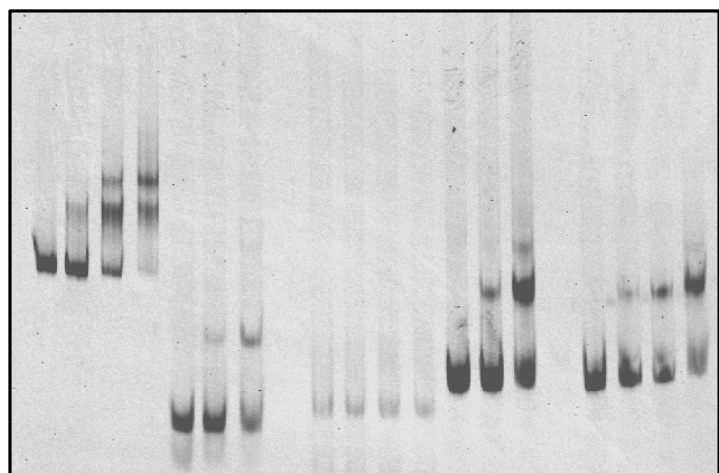

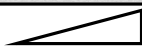  
 0 1 4 10  
*PnrJ* long  
 8

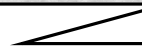  
 0 1 4 10  
*PnrJ* short 1  
 $\Delta$ AlgR\_box1  
 12

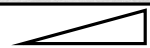  
 0 1 4 10  
*PnrJ* short 2  
 $\Delta$ AlgR\_boxA1  
 13

**Supplementary Fig. S3. AlgR – DNA binding affinities.** EMSA assays for *Pnrda*, *PnrkJ*, and *PalgD* promoter long bands. (A), A wide array of concentrations was used to illustrate different binding affinities (shown below the figures; numbers represent protein amount in pmol). Different boxes involved in bindings are shown in the table below, (B). Most conserved base pairs are underlined, and cytosine in position 7, which is described to distinguish weak and strong binding sites, is marked in gray.

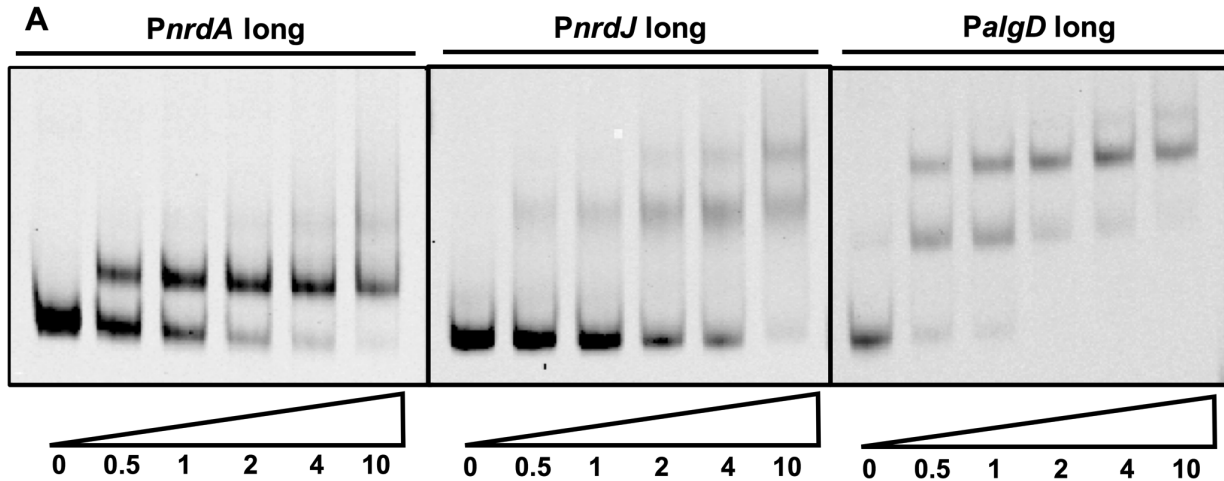

**B**

| Binding site       | Sequence                      | Orientation | Strength | Source    |
|--------------------|-------------------------------|-------------|----------|-----------|
| <i>Pnrda</i> box 1 | G <u>CCATTC</u> <u>CGTC</u> G | 3'-5' ←     | Strong   | This work |
| <i>PnrkJ</i> box 1 | G <u>CCGCCG</u> <u>GTC</u> C  | 5'-3' →     | Weak     | This work |
| <i>PnrkJ</i> box 2 | G <u>CCGGCT</u> <u>GTC</u> T  | 5'-3' →     | Weak     | This work |
| <i>PalgD</i> RB1   | A <u>CCGTT</u> <u>CGTC</u> C  | 5'-3' →     | Strong   | 1, 2      |
| <i>PalgD</i> RB2   | A <u>CCGTT</u> <u>CGTC</u> T  | 5'-3' →     | Strong   | 1, 2      |
| <i>PalgD</i> RB3   | G <u>CCGTTT</u> <u>GTC</u> C  | 3'-5' ←     | Weak     | 1, 2      |
| <i>PalgC</i> ABS1  | C <u>CCGTT</u> <u>CGTC</u> G  | 5'-3' →     | Strong   | 3         |
| <i>PalgC</i> ABS2  | T <u>CCGTT</u> <u>GTT</u> CC  | 5'-3' →     | Weak     | 3         |
| <i>PalgC</i> ABS3  | A <u>CCGT</u> <u>GCGTC</u> G  | 5'-3' →     | Strong   | 3         |

(1) Kato, J. and A. M. Chakrabarty (1991). "Purification of the regulatory protein AlgR1 and its binding in the far upstream region of the *algD* promoter in *Pseudomonas aeruginosa*." *Proc Natl Acad Sci U S A* 88(5): 1760-1764.

(2) Mohr, C. D., et al. (1991). "AlgR, a response regulator controlling mucoidy in *Pseudomonas aeruginosa*, binds to the FUS sites of the *algD* promoter located unusually far upstream from the mRNA start site." *J Bacteriol* 173(16): 5136-5143.

(3) Zielinski, N. A., et al. (1991). "Characterization and regulation of the *Pseudomonas aeruginosa* *algC* gene encoding phosphomannomutase." *J Biol Chem* 266(15): 9754-9763.

**Supplementary Fig. S4. Cooperative regulation of AlgZR and Anr/Dnr systems on RNR class II.** Gene reporter assay for the *PnrdJ* promoter fused to GFP, during anaerobic liquid cultures, grown to  $OD_{550} = 2.0$ . The cooperative action of these two systems is explored by combining a  $\Delta algR$  background with the mutation of the Anr/Dnr box on *PnrdJ*. Values are averages from at least three independent experiments; error bars show positive standard deviation. Asterisks (\*) indicate statistically significant differences from the wild-type strain harboring *PnrdJ* wild-type promoter ( $p$ -value less than 0.05 in pairwise T-tests). Shortened names are used (see Table S1).

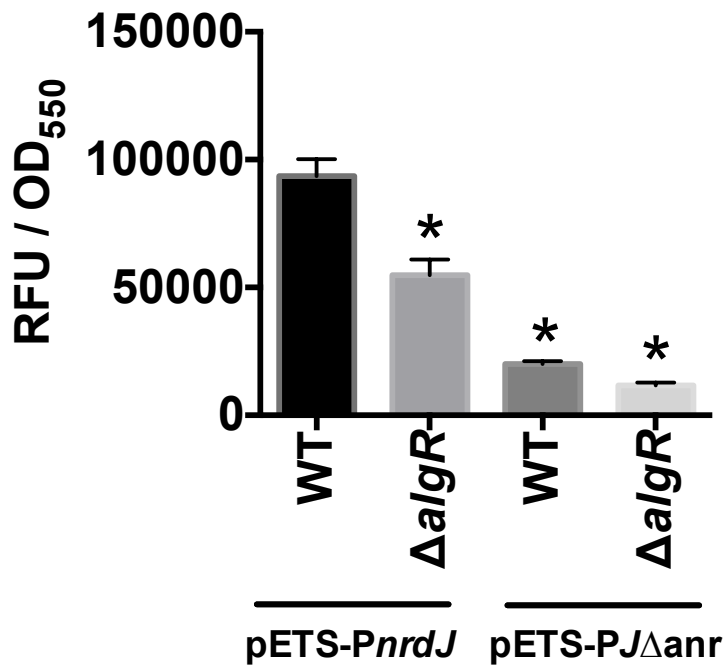

**Supplementary Fig. S5. Protein overexpression and purification.** Coomassie blue-stained gel showing SDS-PAGE analysis of AlgR wild type and AlgRD54N overexpression. MW, molecular weight marker; CE, crude extract; FT, flow through; UN, nonspecific elution step; P, protein recovered after specific elution step. Molecular weights of the standards are indicated.

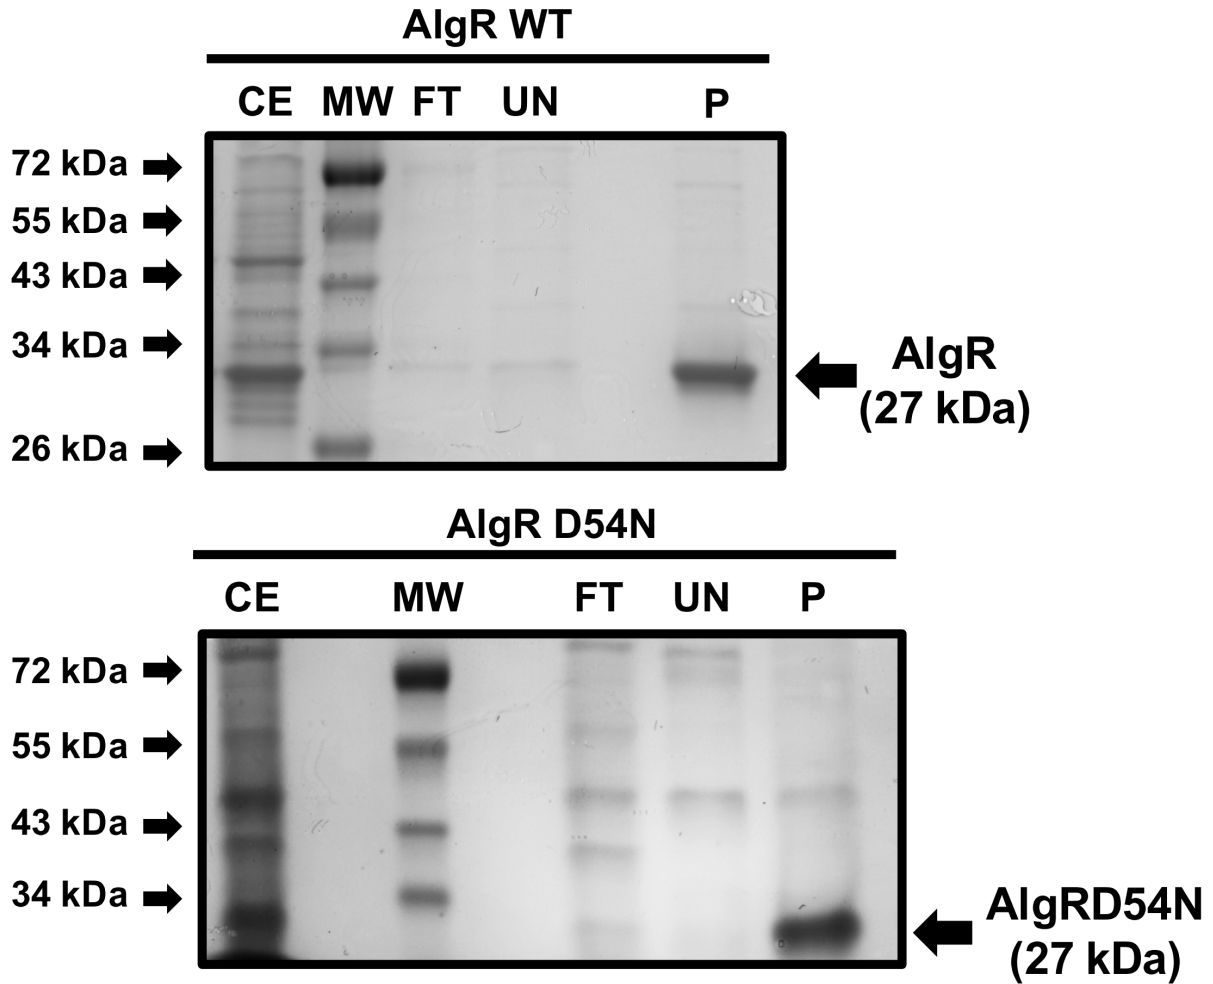

**Supplementary Table S1. Bacterial strains and plasmids used in this study.** For each element, a general description is provided, together with an alternative self-explanatory name which will be commonly used in figures to make interpretation of the data easier for the reader. Throughout all the paper, a P before the name of a gene indicates the promoter controlling this gene (e.g., *PnrdA* for *nrdAB* operon promoter).

| Name            | Referred as...         | Description                                                                                    | Source     |
|-----------------|------------------------|------------------------------------------------------------------------------------------------|------------|
| <b>Plasmids</b> |                        |                                                                                                |            |
| pGEM-T easy     | pGEM-T easy            | A/T cloning vector; Amp <sup>R</sup>                                                           | Promega    |
| pUCP20T         | pUCP20T                | Broad-host-range vector; Amp <sup>R</sup>                                                      | (1)        |
| pET28a          | pETS28a                | Vector for His <sub>6</sub> -tagged protein overexpression; Kn <sup>R</sup>                    | Laboratory |
| pETS130-GFP     | pETS130                | Broad host range, promoterless GFP; Gm <sup>R</sup>                                            | (2)        |
| pETS134         | pETS- <i>PnrdA</i>     | pETS130 derivative carrying <i>nrdA</i> promoter; Gm <sup>R</sup>                              | (2)        |
| pETS136         | pETS- <i>PnrdD</i>     | pETS130 derivative carrying <i>nrdD</i> promoter; Gm <sup>R</sup>                              | (2)        |
| pETS180         | pETS- <i>PnrdJ</i>     | pETS130 derivative carrying <i>nrdJ</i> promoter; Gm <sup>R</sup>                              | (3)        |
| pETS191         | pETS- <i>PJΔdnr</i>    | pETS130 derivative carrying Anr/Dnr box mutating in <i>PnrdJ</i> ; Gm <sup>R</sup>             | (4)        |
| pETS201         | pETS201                | pET28a derivative carrying <i>algR</i> , AlgR overproducer, Kn <sup>R</sup>                    | This work  |
| pETS202         | pETS202                | pET28a derivative carrying <i>algRD54N</i> , AlgRD54N overproducer, Kn <sup>R</sup>            | This work  |
| pETS203         | pUCP- <i>AlgR</i>      | pUCP20T derivative carrying the <i>algR</i> gene; Cb <sup>R</sup>                              | This work  |
| pETS204         | pUCP- <i>D54N</i>      | pUCP20T derivative carrying the <i>algRD54N</i> gene; Cb <sup>R</sup>                          | This work  |
| pETS205         | pETS- <i>PalgD</i>     | pETS130 derivative carrying <i>algD</i> promoter; Gm <sup>R</sup>                              | This work  |
| pETS206         | pETS- <i>P1157</i>     | pETS130 derivative carrying <i>PA1157</i> promoter; Gm <sup>R</sup>                            | This work  |
| pETS207         | pETS- <i>PalgR</i>     | pETS130 derivative carrying <i>algR</i> promoter; Gm <sup>R</sup>                              | This work  |
| pETS208         | pETS- <i>PAΔbox1</i>   | pETS130 derivative carrying AlgR-box1 mutation in <i>PnrdA</i> , Gm <sup>R</sup>               | This work  |
| pETS209         | pETS- <i>PJΔbox1</i>   | pETS130 derivative carrying AlgR-box1 mutation in <i>PnrdJ</i> , Gm <sup>R</sup>               | This work  |
| pETS210         | pETS- <i>PJΔbox2</i>   | pETS130 derivative carrying AlgR-box2 mutation in <i>PnrdJ</i> , Gm <sup>R</sup>               | This work  |
| pETS211         | pETS- <i>PJΔbox1+2</i> | pETS130 derivative carrying AlgR-box1 and AlgR-box2 mutation in <i>PnrdJ</i> , Gm <sup>R</sup> | This work  |
| <b>Strains</b>  |                        |                                                                                                |            |



---

|                             |                           |                                                                                                                    |               |
|-----------------------------|---------------------------|--------------------------------------------------------------------------------------------------------------------|---------------|
| <b><i>E. coli</i></b>       |                           |                                                                                                                    |               |
| DH5 $\alpha$                | DH5 $\alpha$              | <i>recA1 endA1 hsdR17 supE44 thi-1 relA1 <math>\Delta</math>(lacZYA-argF)U169 deoR <math>\Phi</math>80dlacZM15</i> | Laboratory    |
| Rossetta(DE3)               | Rosetta                   | <i>F ompT hsdS<sub>B</sub> (r<sub>B</sub><sup>-</sup> m<sub>B</sub><sup>-</sup>) gal dcm (DE3) pRARE (CamR)</i>    | Merck         |
| <b><i>P. aeruginosa</i></b> |                           |                                                                                                                    |               |
| PAO1                        | PAO1 WT                   | Wild-type (ATCC 15692 / CECT 4122) - Spanish Type Culture Collection                                               | Lab strain    |
| PW9855                      | PAO1 $\Delta$ <i>algR</i> | <i>P. aeruginosa</i> PAO1 <i>algR::ISphoA/hah</i> ; Tc <sup>R</sup>                                                | (5)           |
| PAOMA                       | PAO1 $\Delta$ <i>mucA</i> | <i>P. aeruginosa mucA</i> strain                                                                                   | A. Oliver Lab |

1. **West SE, Schweizer HP, Dall C, Sample AK, Runyen-Janecky LJ.** 1994. Construction of improved *Escherichia-Pseudomonas* shuttle vectors derived from pUC18/19 and sequence of the region required for their replication in *Pseudomonas aeruginosa*. *Gene* **148**:81-86.
2. **Sjöberg BM, Torrents E.** 2011. Shift in ribonucleotide reductase gene expression in *Pseudomonas aeruginosa* during infection. *Infect Immun* **79**:2663-2669.
3. **Crespo A, Pedraz L, Torrents E.** 2015. Function of the *Pseudomonas aeruginosa* NrdR Transcription Factor: Global Transcriptomic Analysis and Its Role on Ribonucleotide Reductase Gene Expression. *PLoS One* **10**:e0123571.
4. **Crespo A, Pedraz L, Astola J, Torrents E.** 2016. *Pseudomonas aeruginosa* Exhibits Deficient Biofilm Formation in the Absence of Class II and III Ribonucleotide Reductases Due to Hindered Anaerobic Growth. *Front Microbiol* **7**:688.
5. **Jacobs MA, Alwood A, Thaipisuttikul I, Spencer D, Haugen E, Ernst S, Will O, Kaul R, Raymond C, Levy R, Chun-Rong L, Guenther D, Bovee D, Olson MV, Manoil C.** 2003. Comprehensive transposon mutant library of *Pseudomonas aeruginosa*. *Proc Natl Acad Sci U S A* **100**:14339-14344.

**Supplementary Table S2. Primers and probes used in this study.**

| <b>Name</b>              | <b>Sequence (5'→3')</b>              | <b>Application</b>                                  |
|--------------------------|--------------------------------------|-----------------------------------------------------|
| M13-dir                  | GTTTTCCCAGTCACGAC                    | Check-Cloning                                       |
| M13-rev                  | CAGGAAACAGCTATGACC                   | Check-Cloning                                       |
| pUCP20T-up               | CCTCTTCGCTATTACGCCAG                 | Cloning                                             |
| pUCP20T-low              | TCCGGCTCGTATGTTGTGTG                 | Cloning                                             |
| pBBR1-up                 | CATCGCAGTCGGCCTATTGG                 | Cloning                                             |
| pBBR1-low                | CACTTTATGCTTCCGGCTCG                 | Cloning                                             |
| AlgR-up                  | ACATATGAATGTCCTGATTGTTCGATG          | AlgR overproducer                                   |
| AlgR-low                 | ATCAGAGCTGATGCATCAGAC                | AlgR overproducer                                   |
| AlgRD54N-up              | GCGGATGTTTCAGCAGGAC                  | AlgRD54N overproducer                               |
| AlgRD54N-low             | GTCCTGCTGAACATCCGC                   | AlgRD54N overproducer                               |
| PfimSalgR-up             | GGATCCTGTCTTCCTGGTTGTCCTTGTT         | <i>PfimSalgR</i> cloning / AlgR complementation     |
| PalgR-SmaI-GFP-low       | TTCCCGGGCTTGAATCGGAT                 | <i>PfimSalgR</i> cloning                            |
| PA1157-up                | AAGGATCCGGTATGCATGGGTGGGTATC         | <i>PA1157</i> promoter cloning                      |
| PA1157-low               | AACCCGGGTTCTTGCTCCACACAGCCTC         | <i>PA1157</i> promoter cloning                      |
| PnrDA-BamHI-EcoRI-GFP-up | AGGATCCGAATTCTTGCTCCACACAGCCTC       | <i>PnrDA</i> cloning / EMSA <i>PnrDA</i> long / AFM |
| PnrDA-SmaI-GFP-low       | ACCCGGGTTCTCGCGTGTGGTGTGTCG          | <i>PnrDA</i> cloning / AFM                          |
| PnrDA-EXT-low-M13        | CTGGGCGTCGTTTTACGGCTCCTTGCGATGAG     | EMSA <i>PnrDA</i> long                              |
| PnrDA-AlgR-EMSA-up       | TACATATTGTGGGTAGGGTG                 | EMSA <i>PnrDA</i> short 1                           |
| PnrDA-AlgR-EMSA-low-M13  | CTGGGCGTCGTTTTACGGATAAAGTGTGGGTCTTCT | EMSA <i>PnrDA</i> short 1                           |
| PnrDA-EMSA-up            | TTCCCCCAGACTGTCAC                    | EMSA <i>PnrDA</i> short 2                           |
| PnrDA-EMSA-low-M13       | CTGGGCGTCGTTTTACTCAGAGTGGTCCGTGCG    | EMSA <i>PnrDA</i> short 2                           |
| PnrDJ-AlgR-BamHI-EMSA-up | GGATCCTACGGGTTGCGCCATA               | <i>PnrDJ</i> promoter cloning                       |
| PnrDJ-SmaI-GFP-low       | AACCCGGGACTGCGTTGCGTCTGTC            | <i>PnrDJ</i> promoter cloning / AFM                 |
| PnrDJ-BamHI-GFP-up       | GGATCCCGCGCCCAGCTGAAGGCC             | EMSA <i>PnrDJ</i> long                              |
| PnrDJ-EXT-low-M13        | CTGGGCGTCGTTTTACGGCCACCGTACGCAAC     | EMSA <i>PnrDJ</i> long                              |
| PnrDJ-AlgR-EMSA-up       | TACGGGTTGCGCCATA                     | EMSA <i>PnrDJ</i> short 1                           |
| PnrDJ-AlgR-EMSA-low-M13  | CTGGGCGTCGTTTTACTTCGCTGAGGGTGTGCG    | EMSA <i>PnrDJ</i> short 1                           |

|                    |                                     |                                              |
|--------------------|-------------------------------------|----------------------------------------------|
| PnrJ-mid-up        | CCGACACCCTCAGCGAAG                  | EMSA <i>PnrJ</i> short 2                     |
| PnrJ-mid-low-M13   | CTGGGCGTCGTTTTACAGACAACCTTAGTCATCGG | EMSA <i>PnrJ</i> short 2                     |
| PnrJ-EMSA-up       | TCCCGATGACTAAGGTTGTC                | EMSA <i>PnrJ</i> short 3                     |
| PnrJ-EMSA-low-M13  | CTGGGCGTCGTTTTACCTGATTAACCTCCCGATGG | EMSA <i>PnrJ</i> short 3                     |
| PnrJ-AFM-up        | GCGCAAGTTCGTCAATTTTCG               | AFM                                          |
| PnrD-BamHI-GFP-up  | AGGATCCCGCGACGCCATTTTC              | EMSA <i>PnrD</i> long                        |
| PnrD-EMSA-low-M13  | CTGGGCGTCGTTTTACCTTGAGCAGGGTGGCC    | EMSA <i>PnrD</i> long                        |
| PalgD-BamHI-GFP-up | GGATCCCTCCTCTTTTCGGCAC              | <i>PalgD</i> cloning / EMSA positive control |
| PalgD-low-M13      | CTGGGCGTCGTTTTACTTCCTTAATCTTCGACCCA | EMSA positive control / AFM                  |
| PalgD-SmaI-GFP-low | CCCGGGAGATGCTGATTCGCATC             | <i>PalgD</i> cloning                         |
| PalgD-BamHI-AFM-up | TGGATCCCCCTATCGACTGGAAATGG          | AFM                                          |
| Anr-EcoRI-up       | GAATTCATGGCCGAAACCATCAAG            | EMSA negative control                        |
| Anr-low-M13        | CTGGGCGTCGTTTTACGCATCGGTGATGCTGAAG  | EMSA negative control                        |
| DinB-AFM-up        | CTGGTGATGCTGGTCGTG                  | AFM                                          |
| DinB-low-M13       | CTGGGCGTCGTTTTACCAGCTCCCGCAACCAC    | AFM                                          |
| PnrA-mutAlgR1-up   | GCTTCGCCTAACATTCTCCAGCGCTG          | Mutagenesis <i>PnrA</i> box1                 |
| PnrA-mutAlgR1-low  | TGTTAGGCGAAGCCCTCGGAAAGC            | Mutagenesis <i>PnrA</i> box1                 |
| PnrJ-mutAlgR1-up   | GGTTGCCGTAACGGTCTGCA                | Mutagenesis <i>PnrJ</i> box1                 |
| PnrJ-mutAlgR1-low  | CAGACCGTTACGGCAACCT                 | Mutagenesis <i>PnrJ</i> box1                 |
| PnrJ-mutAlgR2-up   | GCTCTGAAAAGTTCCTGATATCCGC           | Mutagenesis <i>PnrJ</i> boxA1                |
| PnrJ-mutAlgR2-low  | GCGCGGATATCAGGAAGTCTT               | Mutagenesis <i>PnrJ</i> boxA1                |
| PnrJ-mutAlgR3-up   | ATGGCCGCGAACGCTTGAGCG               | Mutagenesis <i>PnrJ</i> boxA2                |
| PnrJ-mutAlgR3-low  | CGCTCAAGCGTTCGCGGCCAT               | Mutagenesis <i>PnrJ</i> boxA2                |
| PnrJ-mutAlgR4-up   | CGAATTTGAAGGCTTAATGGAAAAGC          | Mutagenesis <i>PnrJ</i> box2                 |
| PnrJ-mutAlgR4-low  | TTCCATTAAGCCTTCAAATTCGC             | Mutagenesis <i>PnrJ</i> box2                 |
| WellRed-M13        | [D3-PA]GTCACTGGGCGTCGTTTTAC         | EMSA band infrared labelling                 |

**Supplementary Table S3. PCR reactions and primer pairs used.**

| <b>Primer pair</b> | <b>Forward primer</b>    | <b>Reverse primer</b>   | <b>Application</b>                               |
|--------------------|--------------------------|-------------------------|--------------------------------------------------|
| 1                  | AlgR-D54N-up             | AlgR-D54N-low           | AlgR D54N directed mutagenesis                   |
| 2                  | PfimSalgR-up             | AlgR-low                | AlgR complementation plasmids                    |
| 3                  | PalgD-BamHI-GFP-up       | PalgD-SmaI-GFP-low      | <i>PalgD::gfp</i> transcriptional fusion         |
| 4                  | PfimSalgR-up             | PalgR-SmaI-GFP-low      | <i>PalgR::gfp</i> transcriptional fusion         |
| 5                  | PA1157-up                | PA1157-low              | P <sub>PA1157</sub> ::gfp transcriptional fusion |
| 6                  | PnrdA-BamHI-EcoRI-GFP-up | PnrdA-SmaI-GFP-low      | Outer primers in <i>PnrdA</i> promoter           |
| 7                  | PnrdJ-AlgR-BamHI-GFP-up  | PnrdJ-SmaI-GFP-low      | Outer primers in <i>PnrdJ</i> promoter           |
| 8                  | PnrdA-mutAlgR1-up        | PnrdA-mutAlgR1-low      | <i>PnrdA</i> AlgR box 1 mutagenesis              |
| 9                  | PnrdJ-mutAlgR1-up        | PnrdJ-mutAlgR1-low      | <i>PnrdJ</i> AlgR box 1 mutagenesis              |
| 10                 | PnrdJ-mutAlgR4-up        | PnrdJ-mutAlgR4-low      | <i>PnrdJ</i> AlgR box 2 mutagenesis              |
| 11                 | PnrdJ-mutAlgR2-up        | PnrdJ-mutAlgR2-low      | <i>PnrdJ</i> AlgR box A1 mutagenesis             |
| 12                 | PnrdJ-mutAlgR3-up        | PnrdJ-mutAlgR3-low      | <i>PnrdJ</i> AlgR box A2 mutagenesis             |
| 13                 | PnrdA-BamHI-EcoRI-GFP-up | PnrdA-EXT-low-M13       | EMSA <i>PnrdA</i> long band                      |
| 14                 | PnrdA-AlgR-EMSA-up       | PnrdA-AlgR-EMSA-low-M13 | EMSA <i>PnrdA</i> short 1 band                   |
| 15                 | PnrdA-EMSA-up            | PnrdA-EMSA-low-M13      | EMSA <i>PnrdA</i> short 2 band                   |
| 16                 | PnrdJ-BamHI-GFP-up       | PnrdJ-EXT-low-M13       | EMSA <i>PnrdJ</i> long band                      |
| 17                 | PnrdJ-AlgR-EMSA-up       | PnrdJ-AlgR-EMSA-low-M13 | EMSA <i>PnrdJ</i> short 1 band                   |
| 18                 | PnrdJ-mid-up             | PnrdJ-mid-low-M13       | EMSA <i>PnrdJ</i> short 2 band                   |
| 19                 | PnrdJ-EMSA-up            | PnrdJ-EMSA-low-M13      | EMSA <i>PnrdJ</i> short 3 band                   |
| 20                 | PalgD-BamHI-GFP-up       | PalgD-low-M13           | EMSA <i>PalgD</i> positive control band          |
| 21                 | Anr-EcoRI-up             | Anr-low-M13             | EMSA <i>anr</i> negative control band            |
| 22                 | PnrdA-BamHI-EcoRI-GFP-up | PnrdA-SmaI-GFP-low      | AFM <i>PnrdA</i> probe                           |
| 23                 | PnrdJ-AFM-up             | PnrdJ-SmaI-GFP-low      | AFM <i>PnrdJ</i> probe                           |
| 24                 | PalgD-BamHI-AFM-up       | PalgD-low-M13           | AFM <i>PalgD</i> probe                           |
| 25                 | PdinB-AFM-up             | PdinB-low-M13           | AFM <i>PdinB</i> probe                           |
